# Supplementary material for: Genome analysis of Legionella pneumophila ST23 from various countries reveals highly similar strains
Source: Life Sci Alliance. 2022 Mar 2;5(6):e202101117. doi: 10.26508/lsa.202101117 (PMC8899845; doi:10.26508/lsa.202101117)
Supplement: Supplementary file 9 [file LSA-2021-01117_TableS9.xlsx]

## Sheet: Taxa
Table S9. Loci of difference between Italian and not Italian ST23 highlighted by Phyloviz representation
Loci A	Loci B	Loci C	Loci D	Loci E	Loci F	Loci G	Loci H	Loci I	Loci L	Loci M	Loci N	Loci O	Loci P	Loci Q	Loci R
11A	11A	11A	11A	11A	11A	1762A	1762A	1762A	DK04	DK04	2252A	2252A	2252A	DK06	DK06
DK08	DK08	4440	4606	4711	HL 0437 1017	DK05	DK05	4697	H063280001	LG 0834 5006	DK02	DK07	EUL130	DK09	DK11
4606						4697			4782		DK03	DK10
4711									HL 0307 1012		EUL4	ERR332164
HL 0339 3028									HL 0532 2037			ERR376633
HL 0437 1017									HL 0541 5018			ERR376636
HL 0604 3045									LG 0834 5006
									LG 0839 2025

## Sheet: Loci A
Loci A
Locus	Product	Function	Start	End
lpg0561	acetyoacetyl CoA reductase	Carbohydrate Metabolism	600719	601465
lpg0563	hypothetical protein		602138	602494
lpg0565	spore maturation protein A	Chemotaxis / motility / cell division	603867	604484
lpg0566	spore maturation protein B	Chemotaxis / motility / cell division	604481	605014
lpg1117	hypothetical protein	Protein fate / hydrolases / secretion, Chemotaxis / motility / cell division, Transcription, factors / DNA binding protein	1225771	1226244
lpg1136	hypothetical protein		1250582	1251484
lpg1137	hypothetical protein		1252018	1252986
lpg1138	spermidine/putrescine-binding periplasmic protein PotD	Transport and binding	1253246	1254268
lpg1139	spermidine/putrescine ABC transporter permease protein PotC	Transport and binding	1254265	1255032
lpg2439	NADPH-dependent FMN reductase domain protein	Metabolism of Cofactors and Vitamin	2755062	2755613
lpg2442	PhnB protein		2757333	2757743
lpg2443	hypothetical protein		2757867	2758424
lpg2446	hypothetical protein		2759982	2760260
lpg2450	integral membrane protein		2762115	2762843
lpg2451	putative N-hydroxyarylamine O-acetyltransferase		2762922	2763890
lpg2453	hypothetical protein		2767580	2768029
lpg2454	acetyltransferase, GNAT family, ElaA-like protein		2768334	2768780
lpg2500	carbonic anhydrase Mig5	Detoxification / adaptation	2817593	2818330
lpg2530	3-deoxy-D-arabino-heptulosonate 7-phosphate (DAHP) synthase	Amino Acid Metabolism	2862296	2863339
lpg2534	hypothetical protein	Transcription factors / DNA binding proteins	2866611	2867042
lpg2535	myoglobin-like		2867089	2867496

## Sheet: Loci B
Loci B
Locus	Product	Function	Start	End
lpg0316	preprotein translocase, SecE subunit	Protein fate / hydrolases / secretion	366774	367145
lpg1301	oxidoreductase	Metabolism of Cofactors and Vitamins, Energy Metabolism	1429644	1430942
lpg1799	alanyl tRNA synthetase	Amino Acid Metabolism, Translation	2007376	2009958

## Sheet: Loci C
Loci C
Locus	Product	Function	Start	End
lpg0747	hypothetical protein		818378	819196
lpg0752	N-acetylneuraminic acid synthetase	Carbohydrate Metabolism, Metabolism of Cofactors and Vitamins	822797	823867
lpg0759	glucose-6-phosphate isomerase	Carbohydrate Metabolism, Metabolism of Complex Carbohydrates	829724	831226
lpg0784	phosphopantetheine-protein transferase	Metabolism of Cofactors and Vitamins	858280	859017
lpg0798	hypothetical protein		871761	872147
lpg0799	quinolinate synthetase A (NadA)	Metabolism of Cofactors and Vitamins	872251	873594
lpg0800	L-aspartate oxidase	Amino Acid Metabolism, Metabolism of Cofactors and Vitamins	873669	875318
lpg0802	sulfate transporter	Transport and binding	876838	878541
lpg0803	acyl CoA dehydrogenase, short chain specific	Lipid Metabolism, Metabolism of Complex Lipids	878744	880447
lpg0804	choloylglycine hydrolase	Protein fate / hydrolases / secretion	880677	881675
lpg0806	Na+/H+ antiporter	Transport and binding	884529	885968
lpg0807	nicotinate-nucleotide pyrophosphorylase	Metabolism of Cofactors and Vitamins	885965	886807
lpg0809	succinyl-diaminopimelate desuccinylase	Amino Acid Metabolism	887870	889285
lpg0810	hypothetical protein		889377	889694
lpg0811	rod shape determining protein MreB	Cell envelope synthesis, Signal transduction / other regulatory functions	889884	890927
lpg0815	hypothetical protein		893088	893786
lpg0816	isocitrate dehydrogenase, NADP-dependent	Carbohydrate Metabolism, Metabolism of Other Amino Acids, Energy Metabolism	893884	895152
lpg0827	agglutination protein		905575	907299
lpg0831	flavin containing monooxygenae		910755	912098
lpg0834	anthranilate phosphoribosyltransferase	Amino Acid Metabolism	914284	915318
lpg0836	ABC transporter, ATP binding protein	Transport and binding	915908	916633
lpg0838	hypothetical protein		917120	917689
lpg0841	toluene tolerance ABC transporter, ATP binding protein Ttg2A	Detoxification / adaptation	919557	920354
lpg0843	toluene tolerance protein Ttg2C	Detoxification / adaptation	921130	921606
lpg0844	signal peptide protein, toluene tolerance protein Ttg2D	Detoxification / adaptation	921614	922222
lpg0848	hypothetical TIGR00486		924399	925157
lpg0850	ABC transporter, permease protein	Transport and binding	926020	927270
lpg0851	membrane fusion protein	Protein fate / hydrolases / secretion	927270	928286
lpg0852	hypothetical protein		928676	929269
lpg0853	transcriptional regulator FleQ	Chemotaxis / motility / cell division, Transcription factors / DNA binding proteins	929465	930880
lpg0855	signal peptide peptidase SppA (protease IV)	Protein fate / hydrolases / secretion	931428	932408
lpg0856	heme exporter protein CcmA	Transport and binding	932373	933113
lpg0857	heme exporter protein CcmB	Transport and binding	933110	933790

## Sheet: Loci D
Loci D
Locus	Product	Function	Start	End
lpg1371	lipid A disaccharide synthase	Metabolism of Complex Carbohydrates	1517292	1518446
lpg1406	glycosyltransferase	Metabolism of Complex Carbohydrate	1551307	1552482
lpg1407	dolichol monophosphate mannose synthase	Metabolism of Complex Carbohydrates	1552519	1553904
lpg1430	4-hydroxybenzoate octaprenyltransferase UbiA	Metabolism of Cofactors and Vitamins	1579611	1580459
lpg1431	hypothetical protein		1580593	1580991
lpg1432	FAD linked oxidase		1581071	1582867
lpg1434	xanthosine phosphorylase	Nucleotide Metabolism	1583658	1584497
lpg1435	cytidine deaminase	Nucleotide Metabolism	1584510	1584905
lpg1437	sensor histidine kinase CpxA	Signal transduction / other regulatory functions	1585925	1587319
lpg1439	Mg2+ and Co2+ transporter CorC	Transport and binding, Toxin production / other pathogen functions	1587973	1588863
lpg1441	phosphate starvation-inducible protein PhoH	Detoxification / adaptation, Signal transduction / other regulatory functions	1589296	1590246

## Sheet: Loci E
Loci E
Locus	Product	Function	Start	End
lpg1543	transmembrane protein		1707811	1708485
lpg2349	alkylhydroperoxidase AhpD family core domain protein	Detoxification / adaptation	2654276	2654839
lpg2352	malate dehydrogenase	Carbohydrate Metabolism, Energy Metabolism	2656503	2657495
lpg2354	(oxygen-independent) coproporphyrinogen III oxidase	Metabolism of Cofactors and Vitamins	2658127	2659254
lpg2356	transmembrane protein		2661049	2661882
lpg2357	O-sialoglycoprotein endopeptidase	Protein fate / hydrolases / secretion	2662056	2663057
lpg2359	hypothetical protein		2663704	2664147

## Sheet: Loci F
Loci F
Locus	Product	Function	Start	End
lpg0014	transmembrane protein		18331	19542
lpg0015	multidrug resistance protein	Transport and binding	19643	20716
lpg0035	hypothetical protein		42476	42832
lpg0040	integral membrane protein		47016	48011
lpg0043	hypothetical protein		51460	52320
lpg0047	chloramphenicol acetyltransferase	Detoxification / adaptation	55046	55741
lpg0049	amino acid transporter, permease	Transport and binding	56651	57964
lpg0055	transcriptional regulator, LysR family	Transcription factors / DNA binding proteins	62628	63536
lpg0056	hypothetical protein		63669	64400
lpg0073	diguanylate cyclase/phosphodiesterase domain 2	Signal transduction / other regulatory functions	81213	82814
lpg0074	glutamate synthase	Energy Metabolism, Amino Acid Metabolism	82906	84477
lpg0075	hypothetical protein		84555	84869
lpg0076	hypothetical protein		85025	85606
lpg0077	Xaa-Pro aminopeptidase	Protein fate / hydrolases / secretion	85693	87021
lpg0079	2-polyprenyl-6-methoxyphenol hydroxylase	Metabolism of Cofactors and Vitamins	88210	89373
lpg0084	hypothetical protein		93312	94835
lpg0086	hypothetical protein		95581	97527
lpg0089	hypothetical protein		99132	99578
lpg0091	conserved domain protein		103878	104342
lpg0094	ribose-5-phosphate isomerase A	Carbohydrate Metabolism, Energy Metabolism	107663	108313
lpg0095	cytosolic IMP-GMP specific 5'-nucleotidase	Nucleotide Metabolism	108377	109756
lpg0098	two component sensor and regulator, histidine kinase response regulator	Signal transduction / other regulatory functions	111756	112208
lpg0100	UDP-3-O-[3-hydroxymyristoyl] glucosamine N-acyltransferase	Metabolism of Complex Carbohydrates	114931	116001
lpg0102	3-oxoacyl-(acyl carrier protein) synthase	Lipid Metabolism	117029	118258
lpg0103	N-terminal acetyltransferase, GNAT family	Protein fate / hydrolases / secretion	118383	119243
lpg0104	peptide methionine sulfoxide reductase	Detoxification / adaptation	119362	119937
lpg0105	cytochrome oxidase-like		120045	120641
lpg0106	xanthine/uracil permease	Transport and binding	120944	122224
lpg0107	hypothetical protein		122242	123048
lpg0109	hypothetical protein		123147	123416

## Sheet: Loci G
Loci G
Locus	Product	Function	Start	End
lpg0506	outer membrane protein		547578	549938
lpg0507	outer membrane protein OmpH		550052	550552
lpg0510	(3R)-hydroxymyristoyl-(acyl carrier protein) dehydratase	Metabolism of Complex Carbohydrates	551703	552155
lpg0511	acyl-(acyl carrier protein)-UDP-N-acetylglucosamine acyltransferase	Metabolism of Complex Carbohydrates	552152	552922
lpg1565	thiamine biosynthesis protein NMT-1	Metabolism of Cofactors and Vitamins	1731264	1732214
lpg1566	thiamine biosynthesis oxidoreductase ThiO	Metabolism of Cofactors and Vitamins	1732217	1733287
lpg1571	TolB colicin import protein	Transport and binding	1737722	1738981
lpg1572	TolA colicin import membrane protein	Transport and binding	1738987	1739985
lpg1573	biopolymer transport protein TolR	Transport and binding	1739982	1740437
lpg1700	uracil DNA glycosylase	Nucleotide Metabolism	1894092	1894811
lpg1726	oxidoreductase, acyl CoA dehydrogenase family	Lipid Metabolism, Metabolism of Complex Lipids	1924342	1926828
lpg1727	hydrolase	Protein fate / hydrolases / secretion	1926921	1927706
lpg1729	sn-glycerol-3-phosphate transport, ATP binding protein	Transport and binding	1928571	1929662
lpg1730	sn-glycerol-3-phosphate transmembrane ABC transporter	Transport and binding	1929662	1930432
lpg1731	sn-glycerol-3-phosphate transmembrane ABC transporter	Transport and binding	1930486	1931364
lpg1732	quinone oxidoreductase		1931484	1932485
lpg1734	anthranilate synthase (glutamine amidotransferase) component I	Amino Acid Metabolism	1933935	1936091
lpg1749	signal peptide peptidase	Protein fate / hydrolases / secretion	1949425	1950381
lpg1750	ClpB protein	Detoxification / adaptation, Protein fate	1950470	1953046
lpg1751	hypothetical protein		1953138	1954448
lpg1753	UDP-N-acetylmuramate:L-alanyl-gamma-D-glutamyl-meso-diaminopimelate ligase meso-diaminopimelate ligase	Cell envelope synthesis, Amino Acid Metabolism, Metabolism of Complex Lipids	1955401	1956768

## Sheet: Loci H
Loci H
Locus	Product	Function	Start	End
lpg0447	lphA	Transport and binding, Toxin production / other pathogen functions, Protein fate / hydrolases / secretion	484816	485385
lpg0806	Na+/H+ antiporter	Transport and binding	884529	885968

## Sheet: Loci I
Loci I
Locus	Product	Function	Start	End
lpg0447	lphA	Transport and binding, Toxin production / other pathogen functions, Protein fate / hydrolases / secretion	484816	485385
lpg0486	adenylosuccinate synthetase	Nucleotide Metabolism, Amino Acid Metabolism	525922	527217
lpg0707	(outer) membrane protein		771222	772394
lpg1811	aspartokinase	Amino Acid Metabolism	2024508	2027087
lpg2198	peptide transport, POT family	Transport and binding	2480322	2481827

[truncated: 7 more sheets: Loci L, Loci M, Loci N, Loci O, Loci P, Loci Q, Loci R]
